# Supplementary material for: Coastal extreme sea levels in the Caribbean Sea induced by tropical cyclones
Source: Copernicus journal article supplement (doi:10.5194/nhess-23-587-2023), 2023-02-09
Supplement: Supplementary file 1 [file nhess-23-587-2023-supplement.pdf]

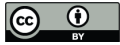

*Supplement of*

## **Coastal extreme sea levels in the Caribbean Sea induced by tropical cyclones**

**Ariadna Martín et al.**

*Correspondence to:* Marta Marcos ([marta.marcos@uib.es](mailto:marta.marcos@uib.es))

The copyright of individual parts of the supplement might differ from the article licence.

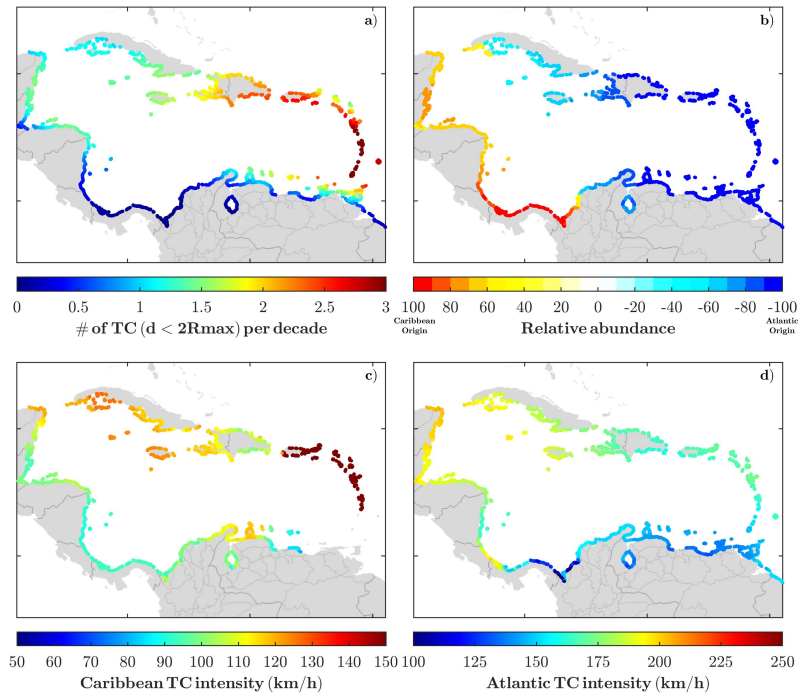

**Figure S1.** The same magnitudes as the Fig.3 is represented but for the total dataset (25494 TCs) of hurricanes that cross the Caribbean Sea.

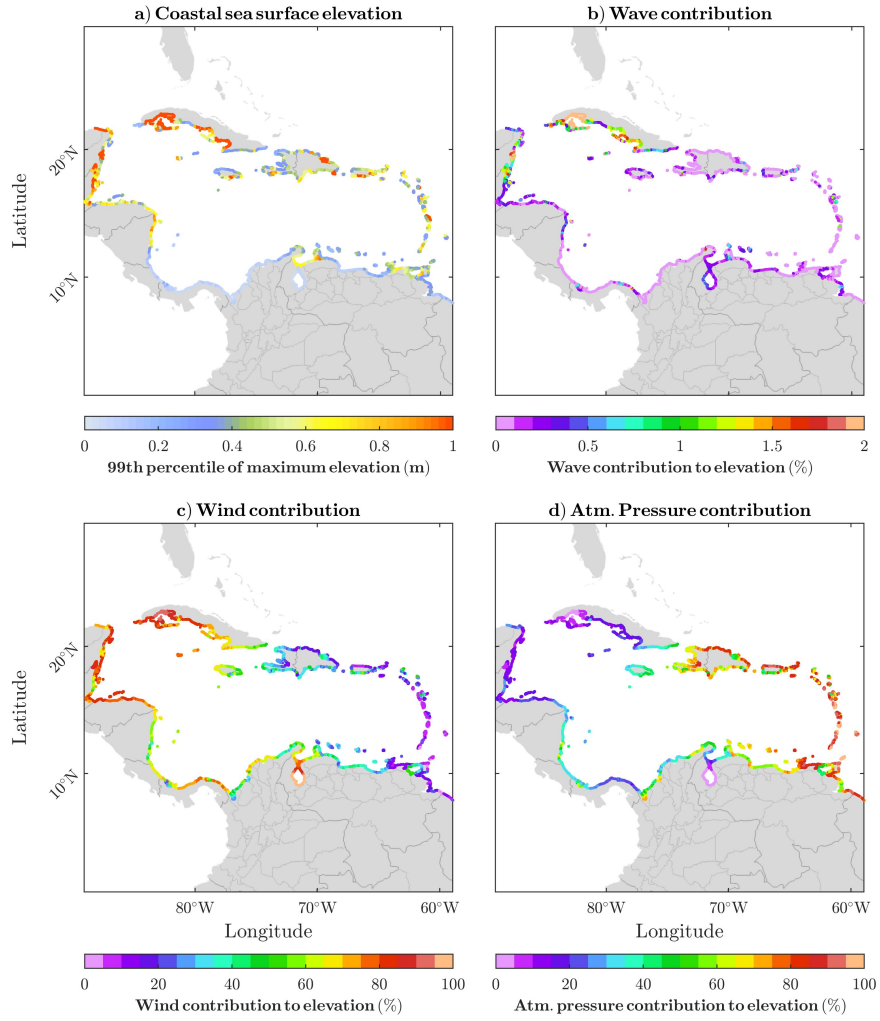

[h]

**Figure S2.** The same magnitude as the Fig.6 is represented, contributions are presented here in relative terms. Note that the colour scales for the wave setup is smaller (b).

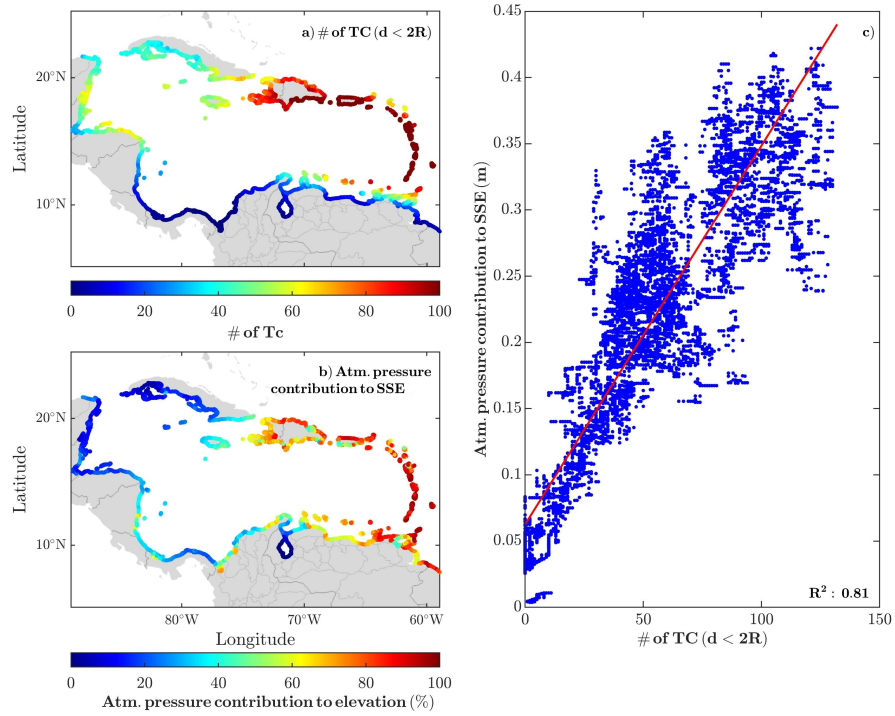

**Figure S3.** Effect of atmospheric pressure of the TCs that cross the Caribbean Sea. The top panel a) shows the number of hurricanes per decade affecting each coastline (that is, those that pass at a distance ( $d$ ) less than twice the radius of maximum speed ( $R$ ), as in Fig.3). Panel b) shows the contribution to SSE due to atmospheric pressure while panel c) shows the correlation between both panels.
